# Supplementary material for: Peroxisome proliferator-activated receptor α activation attenuates the inflammatory response to protect the liver from acute failure by promoting the autophagy pathway
Source: PubMed Central journal article supplement — Cell Death Dis. 2014 Aug 28;5(8):e1397–. doi: 10.1038/cddis.2014.361 (PMC4454331; doi:10.1038/cddis.2014.361), 2014-08-28

Supplementary Fig. 1

D-Gal/LPS

Control

2 h

4 h

6 h

PPAR  $\alpha$

$\beta$ -actin

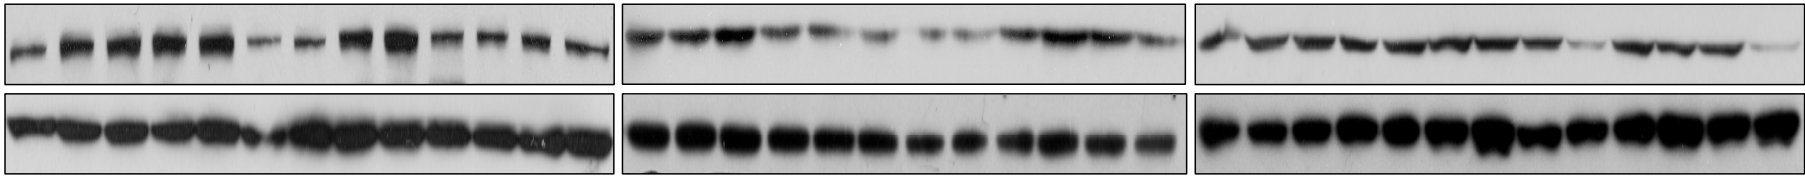

$0.58 \pm 0.07$

$0.37 \pm 0.05$

$0.14 \pm 0.02$

$0.11 \pm 0.02$

**Supplementary Fig. 2**

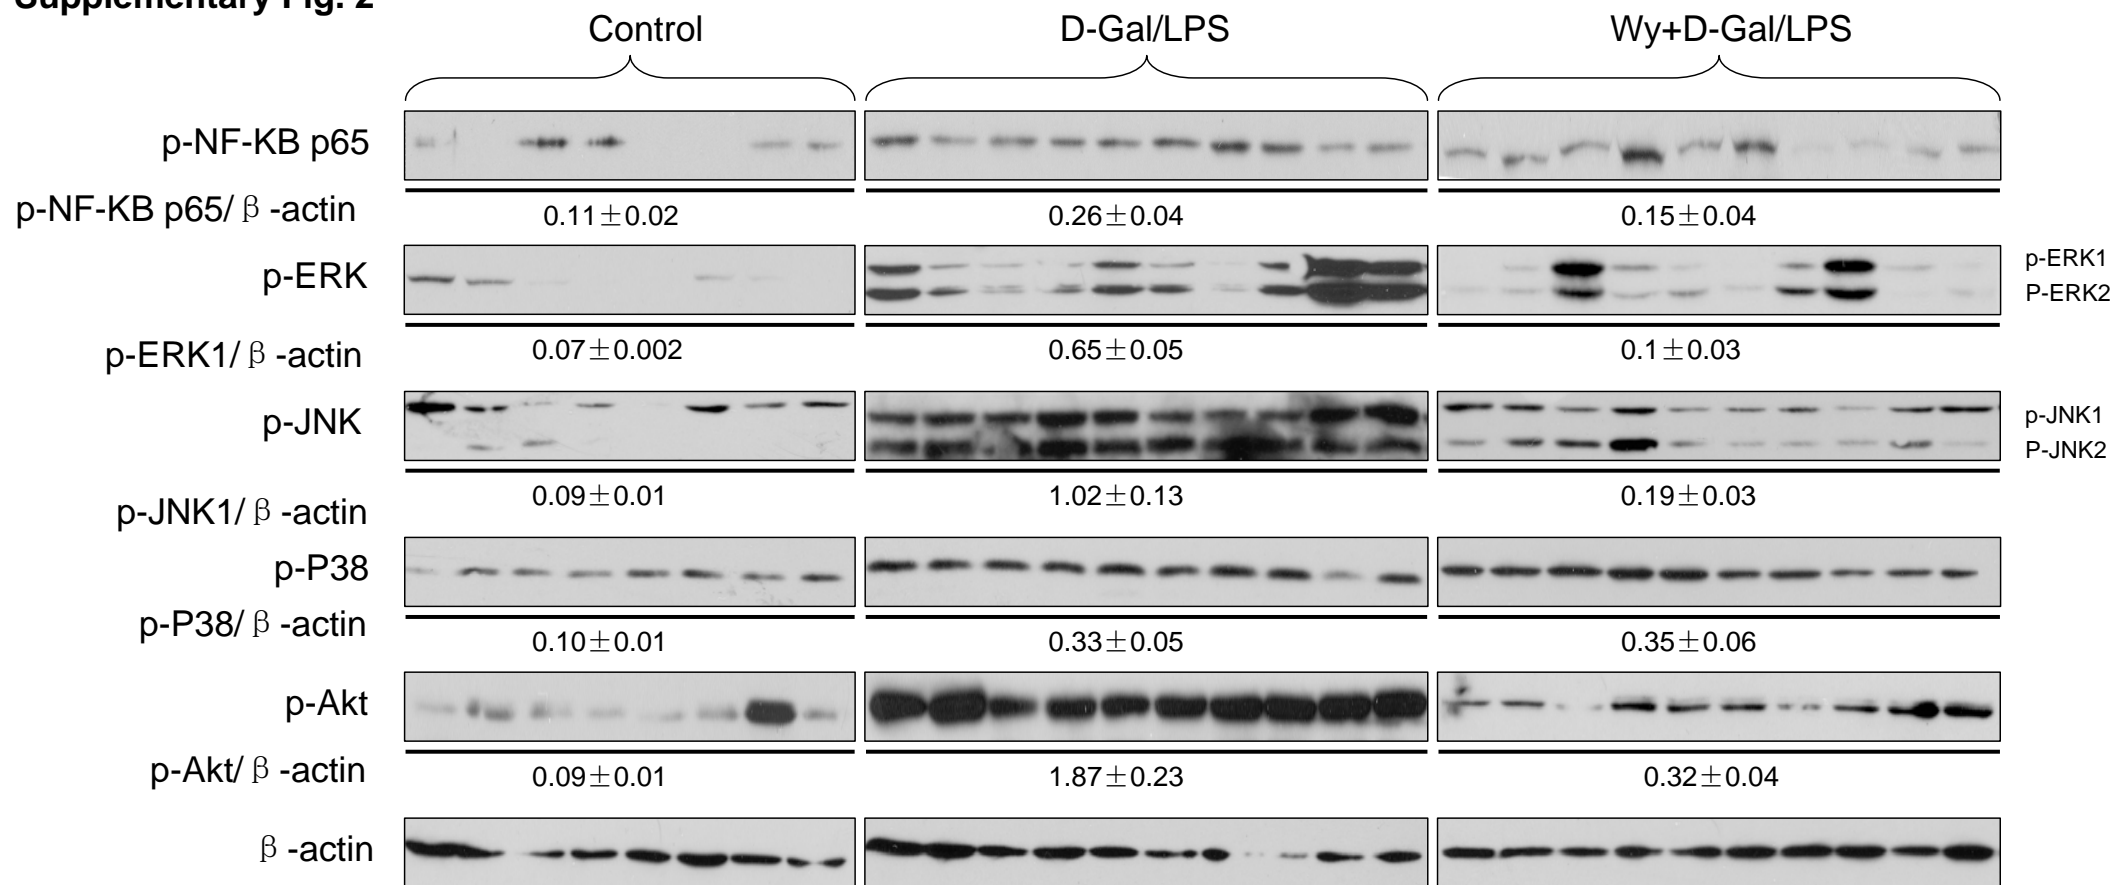

**Supplementary Fig 3**

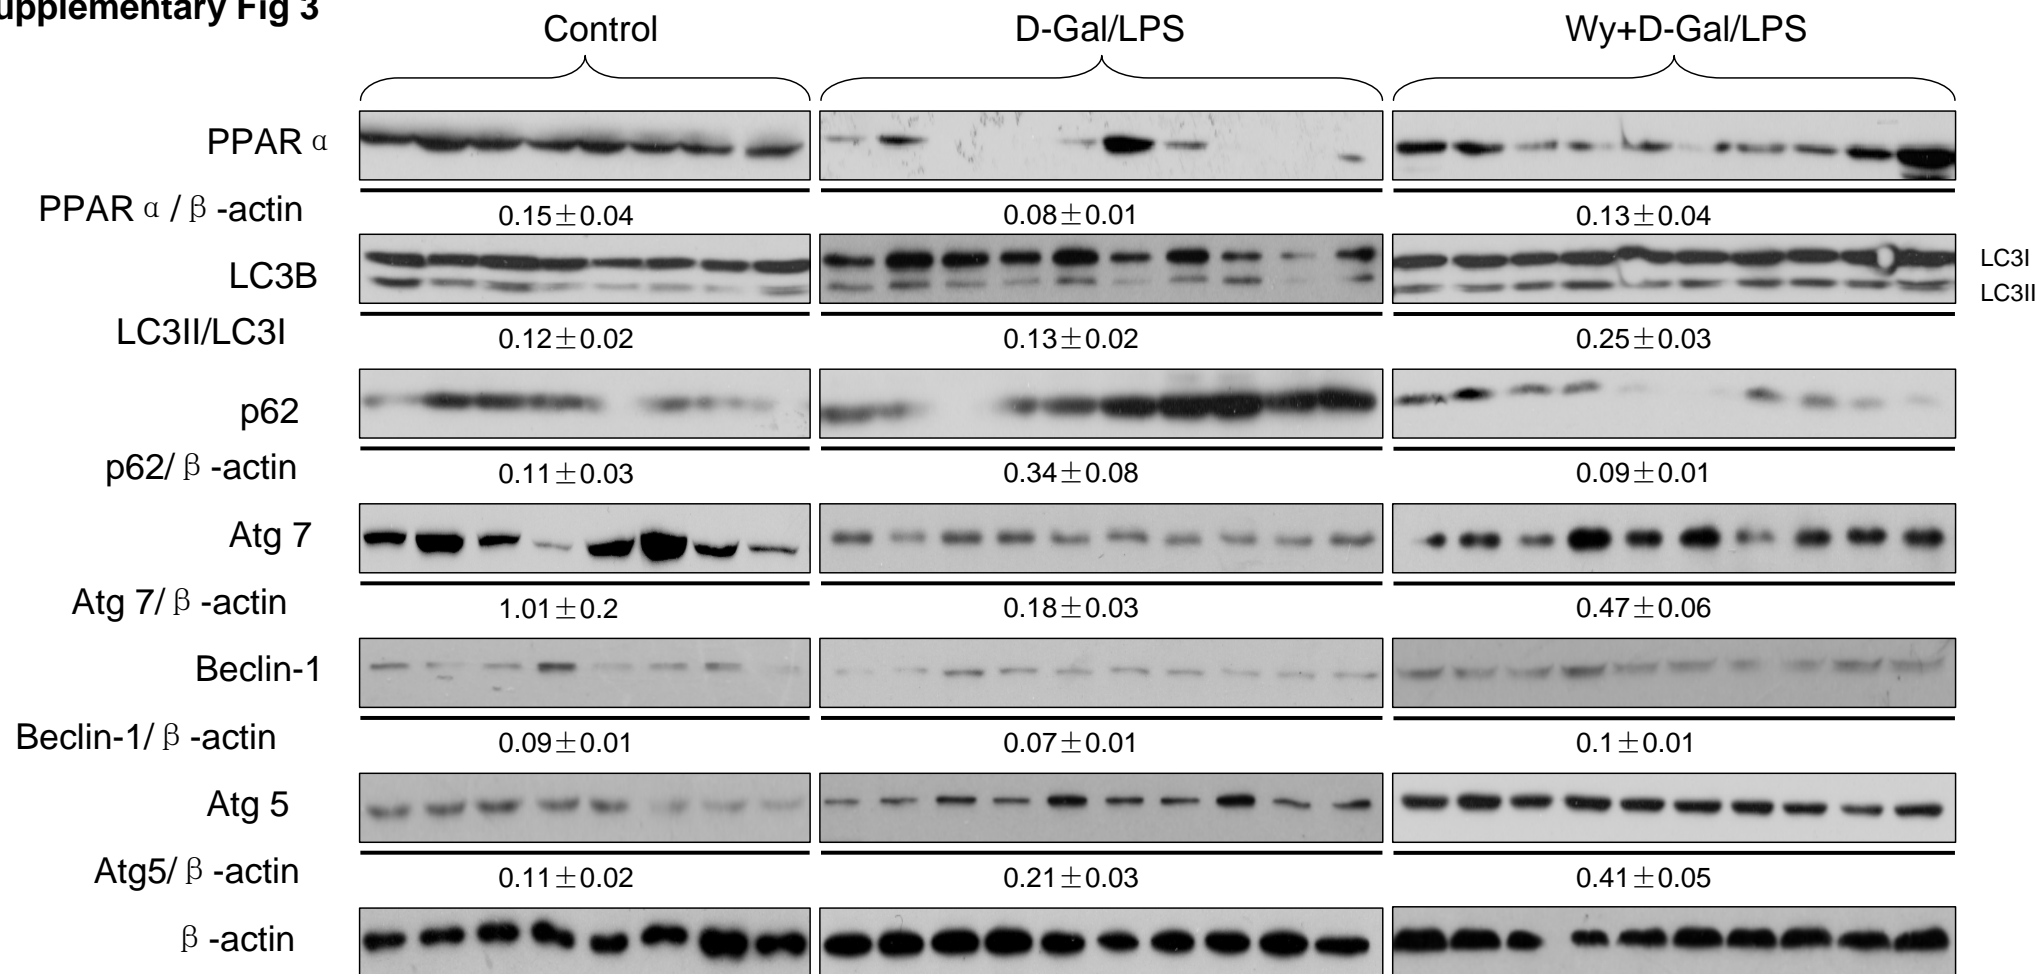

# Supplementary Fig 4

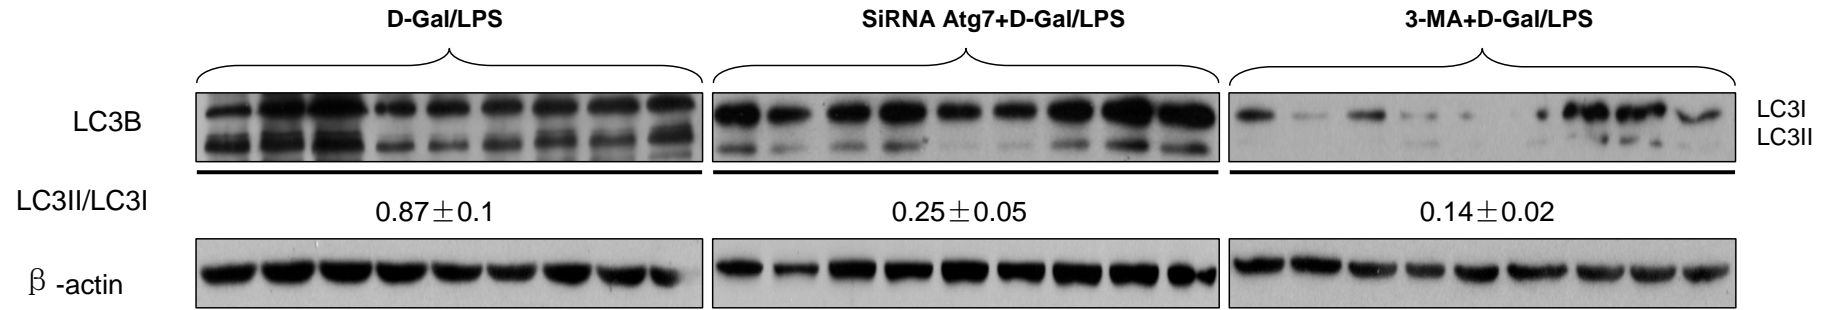

Supplementary Fig 5

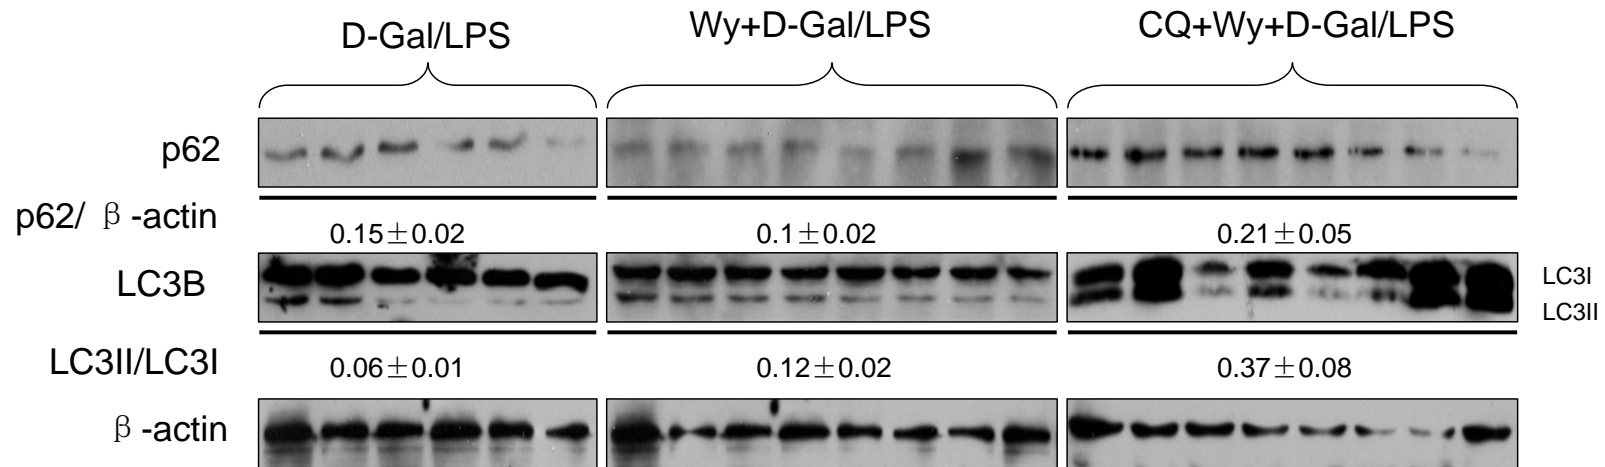

Supplement: cddis2014361x1.pdf [file cddis2014361x1.pdf]
