# Supplementary material for: Peroxisome proliferator-activated receptor α activation attenuates the inflammatory response to protect the liver from acute failure by promoting the autophagy pathway
Source: PubMed Central journal article supplement — Cell Death Dis. 2014 Aug 28;5(8):e1397–. doi: 10.1038/cddis.2014.361 (PMC4454331; doi:10.1038/cddis.2014.361), 2014-08-28
Supplement: cddis2014361x2.pdf [file cddis2014361x2.pdf]

## **Supplementary figure legends**

### **Supplementary Fig. 1 The protein expression of PPAR $\alpha$ is suppressed during**

**ALF progression.** Mice were intraperitoneally injected with D-GalN (700 mg/kg) and LPS (10  $\mu$ g/kg) at 2, 4 and 6 hours (10 mice/group). The mice in the control group (n = 8) were injected with PBS only. Protein expression levels of PPAR $\alpha$  were measured by western blot assays in the livers of the control and the 2-, 4- and 6-hours groups. Densitometry analysis of the proteins was performed for each sample.

### **Supplementary Fig. 2 PPAR $\alpha$ activation by Wy-14,643 regulates NF- $\kappa$ B and**

**MAPK pathway in D-GalN/LPS-induced liver injury.** Wy/D-GalN/LPS-treated mice were administered Wy-14,643 (6 mg/kg) *via* tail vein injection 2 hours prior to D-GalN/LPS exposure (n = 10); D-GalN/LPS-treated mice were pretreated with vehicle (DMSO) 2 hours prior to D-GalN/LPS exposure (n = 10). Control mice were pretreated with vehicle (DMSO) 2 hours prior to PBS injection (n = 8). The mice were sacrificed 6 hours after D-GalN/LPS treatment, and the liver samples were collected. The levels of phosphorylated MAP kinases, including JNK, ERK, p38, and phosphorylated NF- $\kappa$ Bp65, phosphorylated Akt and  $\beta$ -actin were measured by western blotting. Densitometry analysis of the proteins was performed for each sample.

### **Supplementary Fig. 3 PPAR $\alpha$ activation by Wy-14,643 regulates autophagy in**

**D-GalN/LPS-induced liver injury.** Wy/D-GalN/LPS-treated mice were administered Wy-14,643 (6 mg/kg) *via* tail vein injection 2 hours prior to D-GalN/LPS exposure (n

= 10); D-GalN/LPS-treated mice were pretreated with vehicle (DMSO) 2 hours prior to D-GalN/LPS exposure (n = 10). Control mice were pretreated with vehicle (DMSO) 2 hours prior to PBS injection (n = 8). Mice were sacrificed 6 hours after D-GalN/LPS treatment, and liver samples were collected. The protein expression levels of autophagy-related proteins, including LC3B, Atg7, Atg5, Beclin-1, p62 and PPAR $\alpha$ , were measured by western blotting in livers from control mice, D-GalN/LPS-treated mice, and Wy/D-GalN/LPS-treated mice. Densitometry analysis of the proteins was performed for each sample.

**Supplementary Fig. 4 SiRNA Atg7 and 3-MA inhibits the decreased the expression level of LC3II/I in D-GalN/LPS-treated mice.** Protein expression levels of LC3B and  $\beta$ -actin were measured by western blotting in livers from D-GalN/LPS-treated mice (n=9), SiRNA Atg7/D-GalN/LPS-treated mice (n=9) and 3-MA/D-GalN/LPS-treated mice (n=9). Densitometry analysis of the proteins was performed for each sample.

**Supplementary Fig. 5 PPAR $\alpha$  activation by Wy-14,643 regulates autophagy flux in D-GalN/LPS-induced liver injury.** Protein expression levels of LC3B, p62 and  $\beta$ -actin were measured by western blotting in livers from D-GalN/LPS-treated mice (n=6), Wy/D-GalN/LPS-treated mice (n=8) and CQ/ Wy/ D-GalN/LPS-treated mice (n=8). Densitometry analysis of the proteins was performed for each sample.
